# Supplementary material for: Hypothesis on Serenoa repens (Bartram) small extract inhibition of prostatic 5 α -reductase through an in silico approach on 5 β -reductase x-ray structure
Source: PeerJ journal article supplement (doi:10.7717/peerj.2698), 2016-11-22
Supplement: Supporting_Figure_S2.pdf [file Supporting_Figure_S2.pdf]

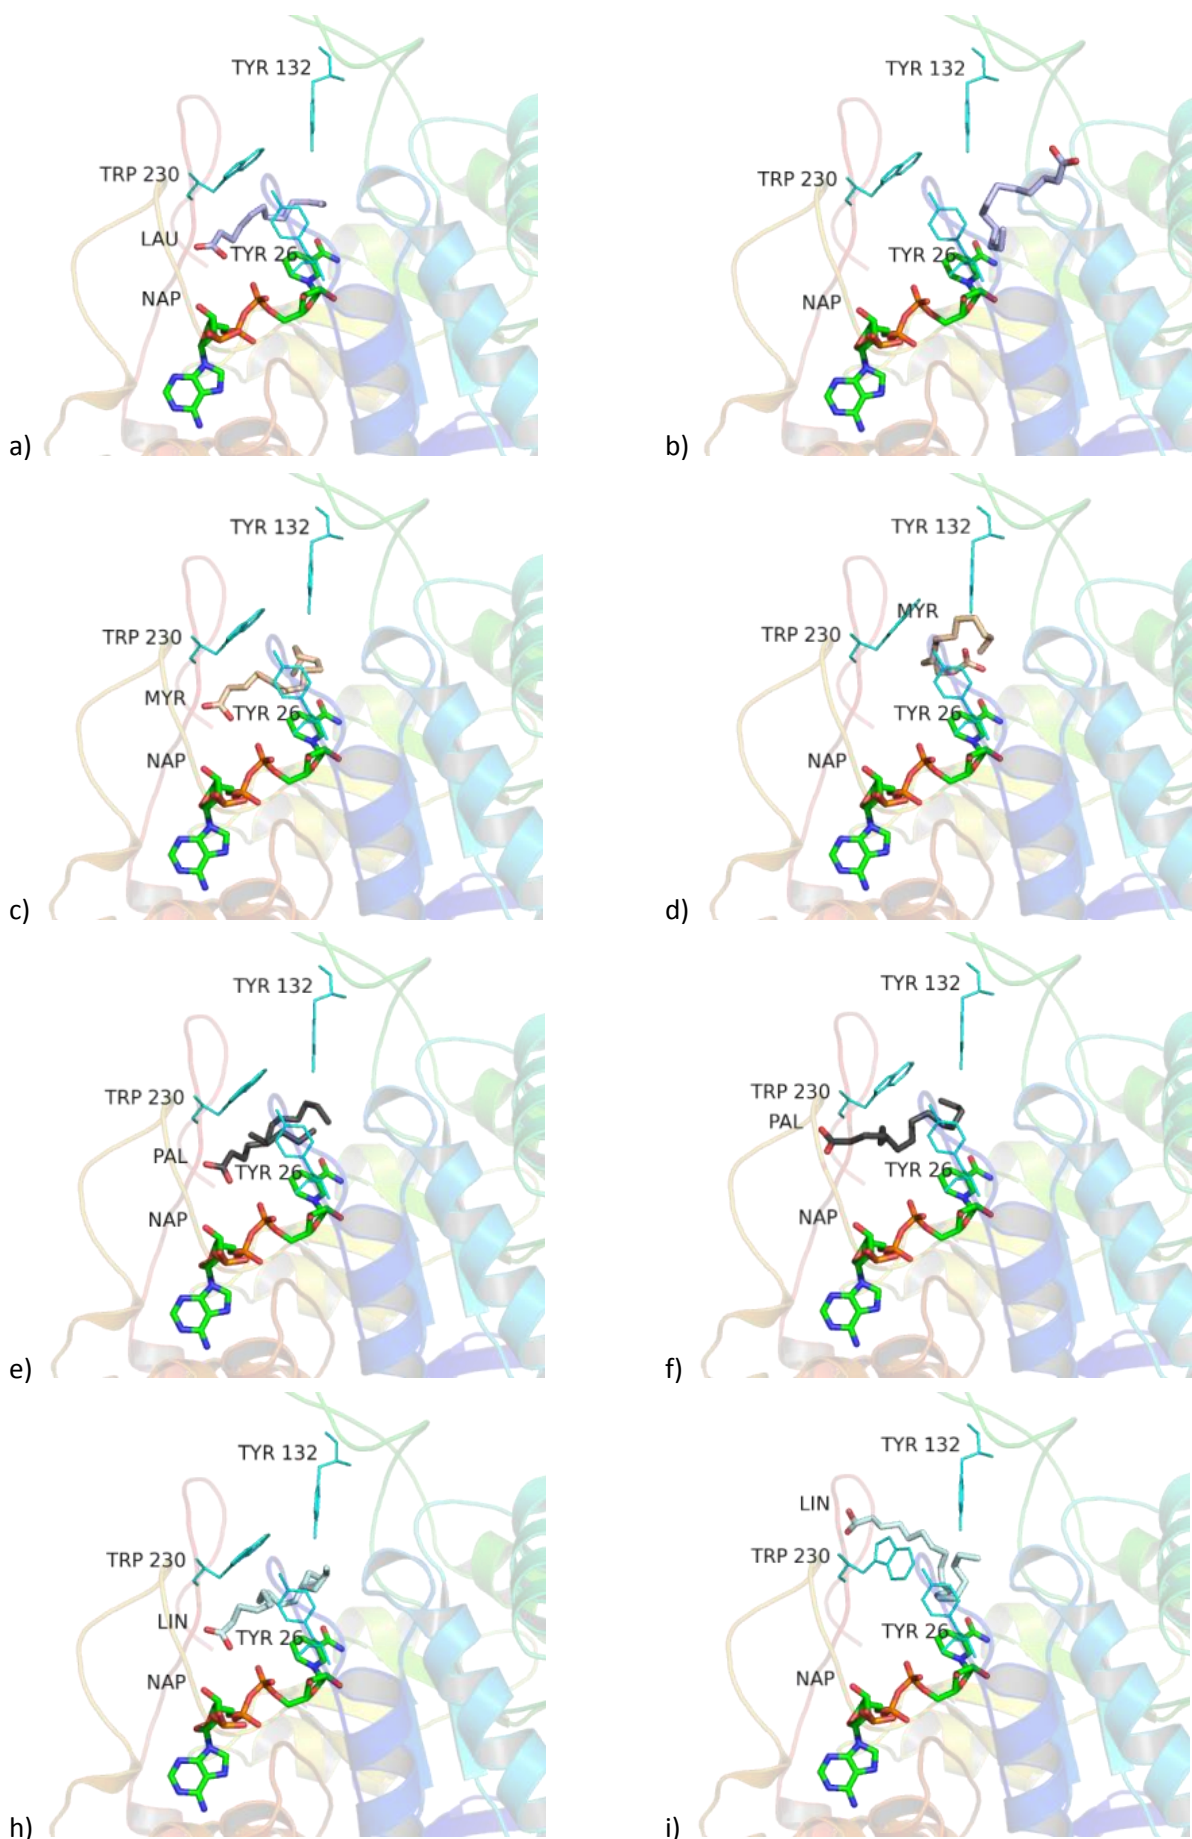

**Supporting Figure S2. Lauric acid (a,b), miristic acid (c,d), palmitic acid (e,f) and linoleic acid (h,i) in the unproductive (left) and productive (right) position.**



**Supporting Figure S2. Lauric acid (a,b), miristic acid (c,d), palmitic acid (e,f) and linoleic acid (h,i) in the unproductive (left) and productive (right) position.**
