# Supplementary material for: Hypothesis on Serenoa repens (Bartram) small extract inhibition of prostatic 5 α -reductase through an in silico approach on 5 β -reductase x-ray structure
Source: PeerJ journal article supplement (doi:10.7717/peerj.2698), 2016-11-22
Supplement: Supporting_Figure_S5.pdf [file Supporting_Figure_S5.pdf]

DUD-E 1

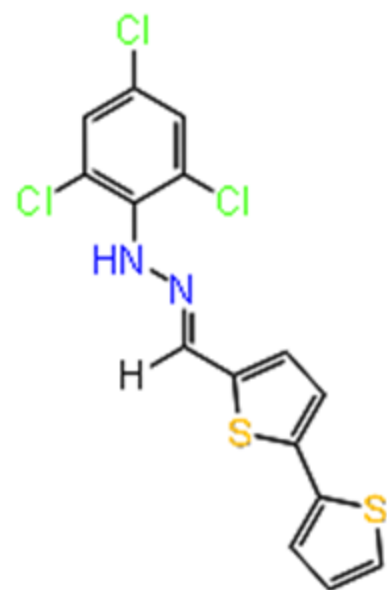

DUD-E 2

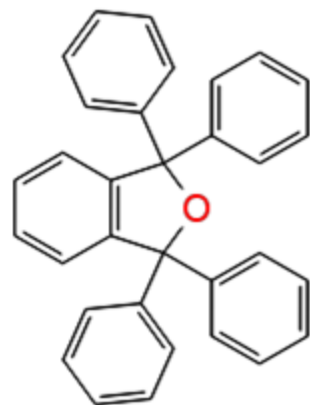

DUD-E 3

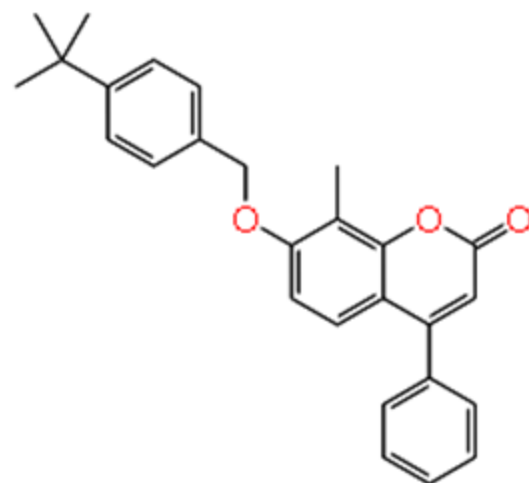

DUD-E 4

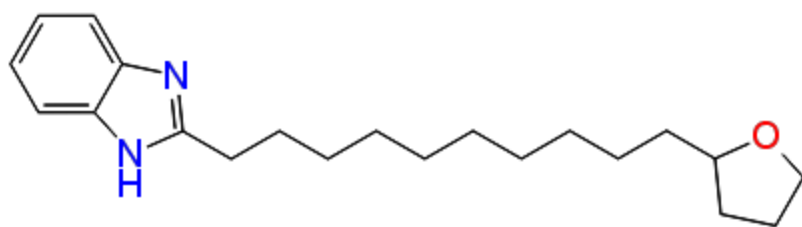

DUD-E 5

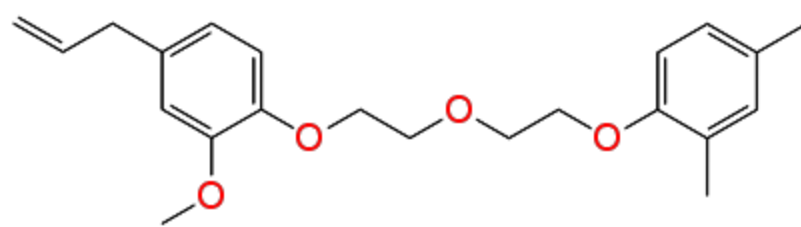

DUD-E 6

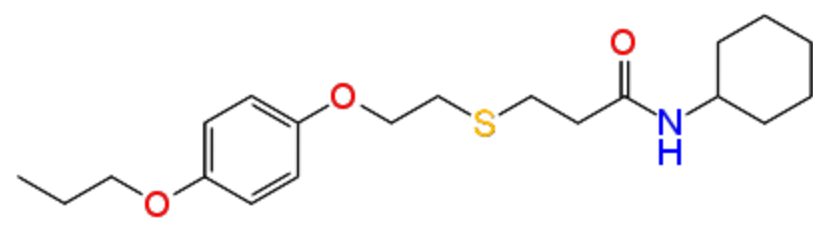

Supporting Figure S5. Formulas of the top 6 decoys generated by DUD-E.
